# Supplementary material for: Vacuum-deposited organic photodetectors utilizing non-fullerene acceptors for enhanced detectivity in the green visible light spectrum
Source: Royal Society of Chemistry journal article supplement (doi:10.1039/d3tc02214e), 2023-01-01
Supplement: d3tc02214e1.pdf [file d3tc02214e1.pdf]

## Electronic Supplementary Information

### **Vacuum-Deposited Organic Photodetector Utilizing Non-Fullerene Acceptor for Enhanced Detectivity in Green Visible Light Spectrum**

M Rivaldi Ali Septian,<sup>†a,b</sup> Richie Estrada,<sup>‡b,c,e</sup> Chih-Chien Lee,<sup>c</sup> Chih-Hsin Chen,<sup>d</sup> Johan Iskandar,<sup>b,c</sup> Nurul Ridho Al Amin,<sup>b,c</sup> Abdul Khalik Akbar,<sup>b</sup> Kasimayan Uma,<sup>b</sup> Shun-Wei Liu<sup>a,b,\*</sup>

<sup>a</sup> Department of Electronic Engineering, Ming Chi University of Technology, New Taipei City 24301, Taiwan.

<sup>b</sup> Organic Electronics Research Center, Ming Chi University of Technology, New Taipei City 24301, Taiwan.

<sup>c</sup> Department of Electronic Engineering, National Taiwan University of Science and Technology, Taipei 10617, Taiwan.

<sup>d</sup> Department of Chemistry, Tamkang University, New Taipei 251, Taiwan.

<sup>e</sup> Department of Electrical Engineering, Krida Wacana Christian University, Jakarta 11470, Indonesia.

<sup>†</sup>M. R. A. S and R. E contributed equally to this study

<sup>\*</sup>S.-W. L. is the corresponding author (E-mail: [swliu@mail.mcut.edu.tw](mailto:swliu@mail.mcut.edu.tw))

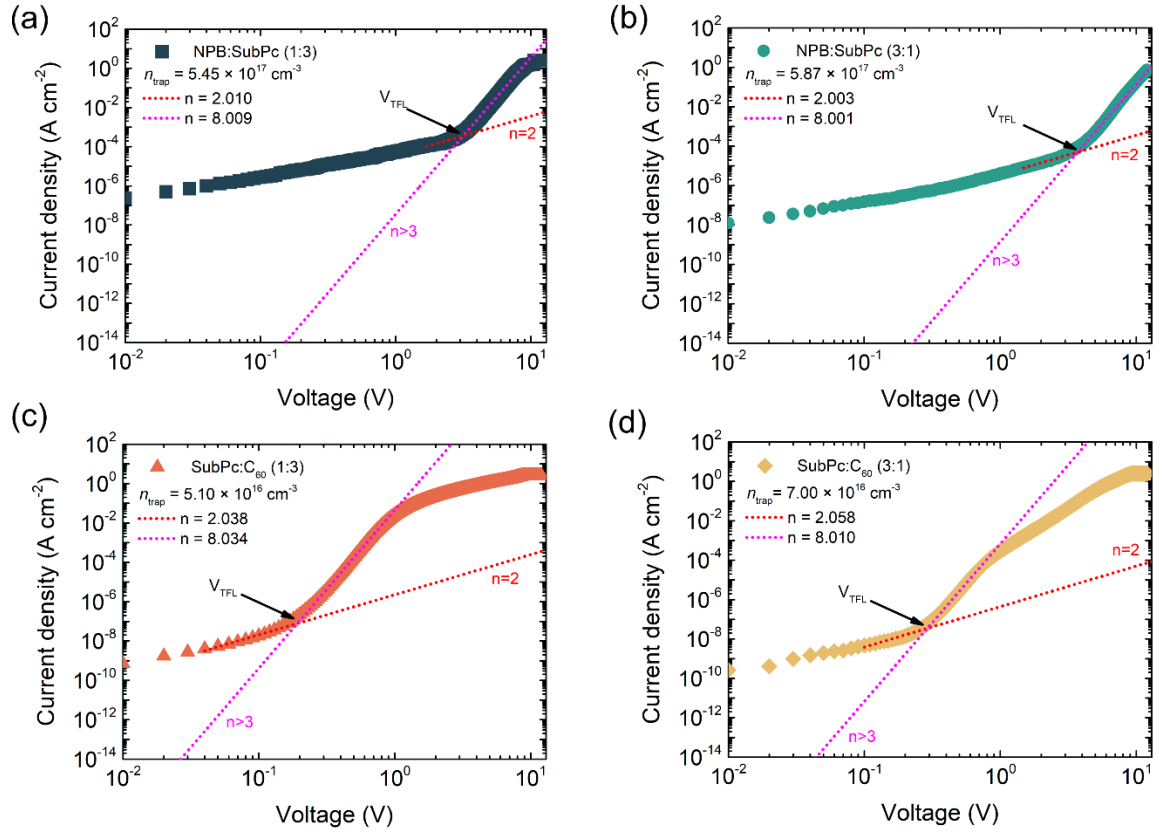

**Figure S1** J-V characteristics of the different active layers of OPD devices indicate different regions to obtain trap state density from electron only device.

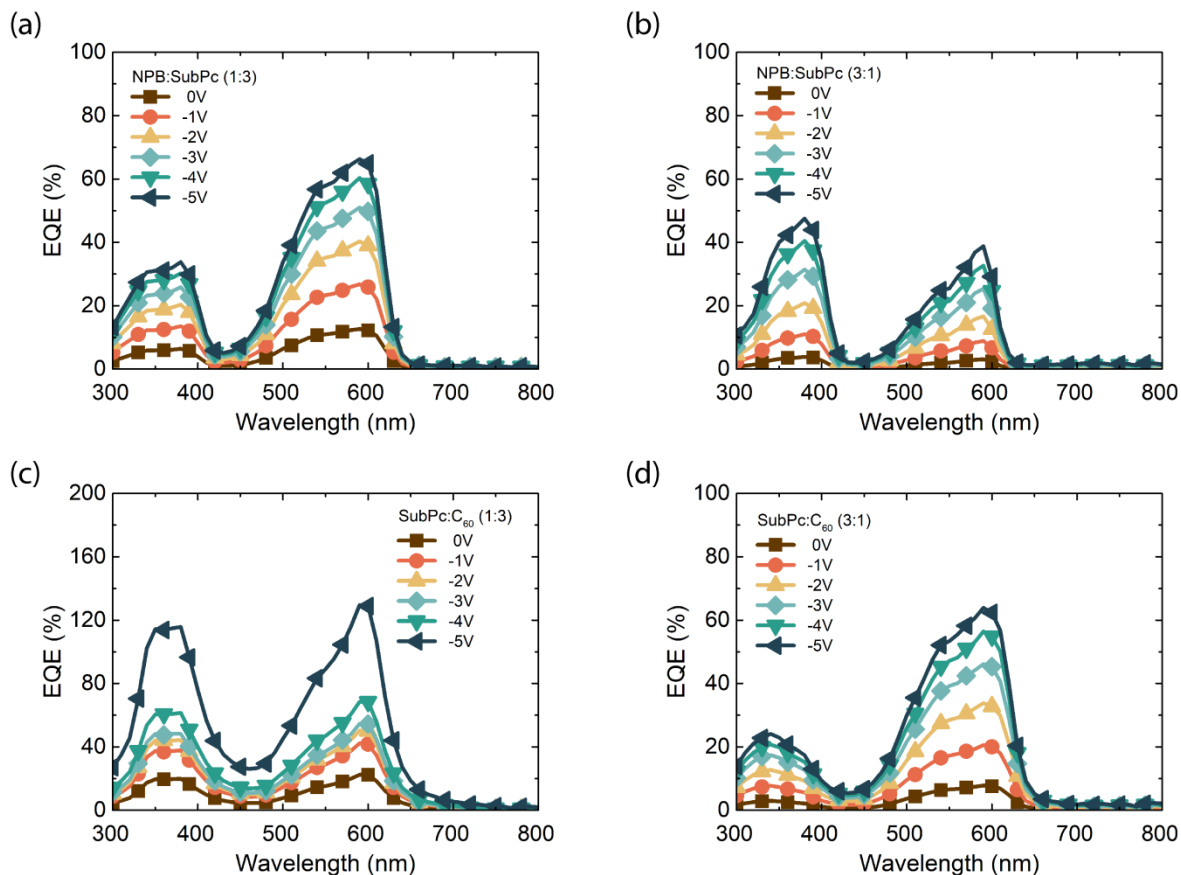

**Figure S2** The external quantum efficiency of different active layers of the OPD devices that consist of (a) NPB:SubPc (1:3), (b) NPB:SubPc (3:1), (c) SubPc:C<sub>60</sub> (1:3), and (d) SubPc:C<sub>60</sub> (3:1).

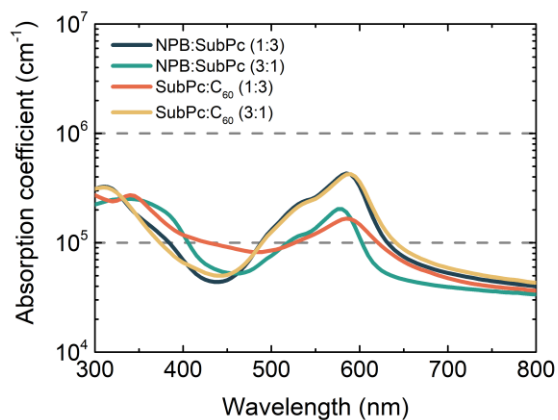

**Figure S3** The absorption coefficient spectra from blending of donor and acceptor with different active layers.

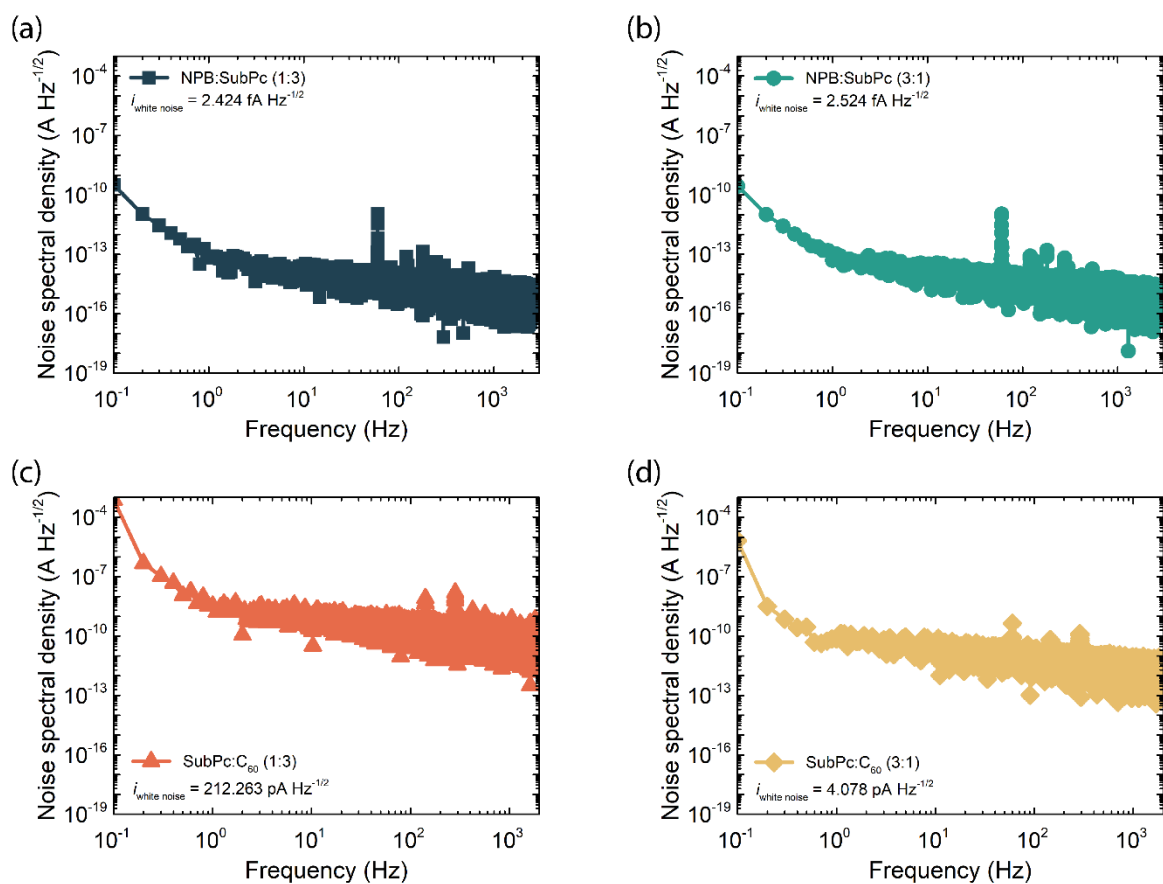

**Figure S4** Noise spectral density of different active layers of the OPD devices using bias voltage of -5 V that consist of (a) NPB:SubPc (1:3), (b) NPB:SubPc (3:1), (c) SubPc:C<sub>60</sub> (1:3), and (d) SubPc:C<sub>60</sub> (3:1).

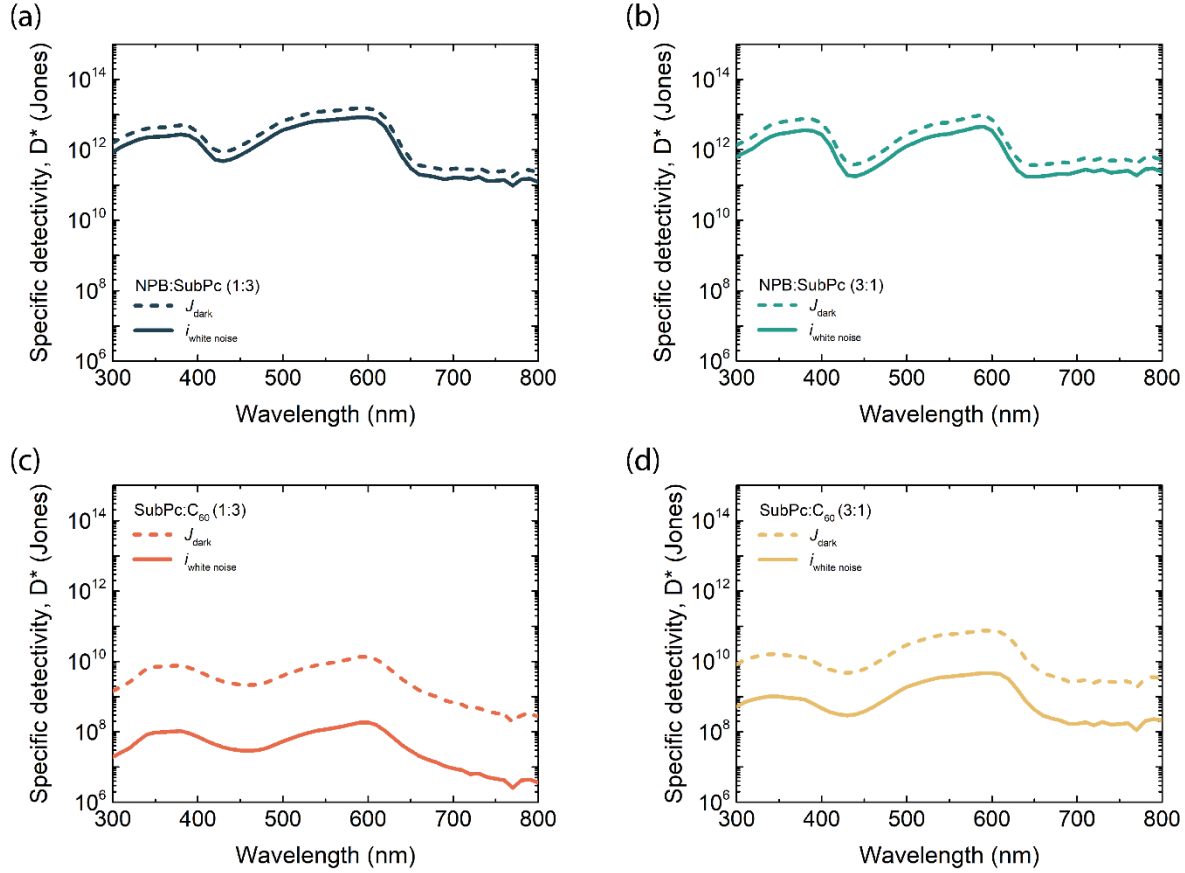

**Figure S5** Specific detectivity based on the dark current density and white noise of different active layers of the OPD devices under a bias voltage of  $-5$  V that consist of (a) NPB:SubPc (1:3), (b) NPB:SubPc (3:1), (c) SubPc:C<sub>60</sub> (1:3), and (d) SubPc:C<sub>60</sub> (3:1).

**Table S1** The summary of noise parameters of OPD devices with various active layers.

| Device | Active Layer                | $I_{\text{shot noise}}$<br>[A Hz <sup>-1/2</sup> ] <sup>a</sup> | $I_{\text{white noise}}$<br>[A Hz <sup>-1/2</sup> ] <sup>b</sup> | $D^*_{\text{white noise}}$<br>[Jones] <sup>c</sup> | Min.<br>Irradiance<br>[W cm <sup>-2</sup> ] <sup>d</sup> |
|--------|-----------------------------|-----------------------------------------------------------------|------------------------------------------------------------------|----------------------------------------------------|----------------------------------------------------------|
| A      | NPB:SubPc (1:3)             | $4.12 \times 10^{-15}$                                          | $2.42 \times 10^{-15}$                                           | $5.78 \times 10^{12}$                              | $4.47 \times 10^{-9}$                                    |
| B      | NPB:SubPc (3:1)             | $3.75 \times 10^{-15}$                                          | $2.52 \times 10^{-15}$                                           | $2.43 \times 10^{12}$                              | $7.47 \times 10^{-9}$                                    |
| C      | SubPc:C <sub>60</sub> (1:3) | $9.12 \times 10^{-12}$                                          | $2.12 \times 10^{-10}$                                           | $9.38 \times 10^7$                                 | $1.55 \times 10^{-4}$                                    |
| D      | SubPc:C <sub>60</sub> (3:1) | $8.07 \times 10^{-13}$                                          | $4.07 \times 10^{-12}$                                           | $3.14 \times 10^9$                                 | $7.29 \times 10^{-6}$                                    |

<sup>a</sup>  $I_{\text{shot noise}}$  is calculated by Equation (5), <sup>b</sup> The  $i_{\text{white noise}}$  is calculated by using Equation (6), <sup>c</sup> Detectivity is calculated using Equation (7), where  $A = 0.04$  cm<sup>2</sup>,  $\Delta\delta = 0.1$ , along to a wavelength of 530 nm. <sup>d</sup> The minimum irradiance is obtained from Equation (9), which is multiplied and divided by  $f_{\text{3dB}}$  and  $A$ , respectively.
